# Supplementary material
Source: PubMed Central journal article supplement (PMC2890177)
Supplement: blood-2009-12-257949_1.pdf [file blood-2009-12-257949_1.pdf]

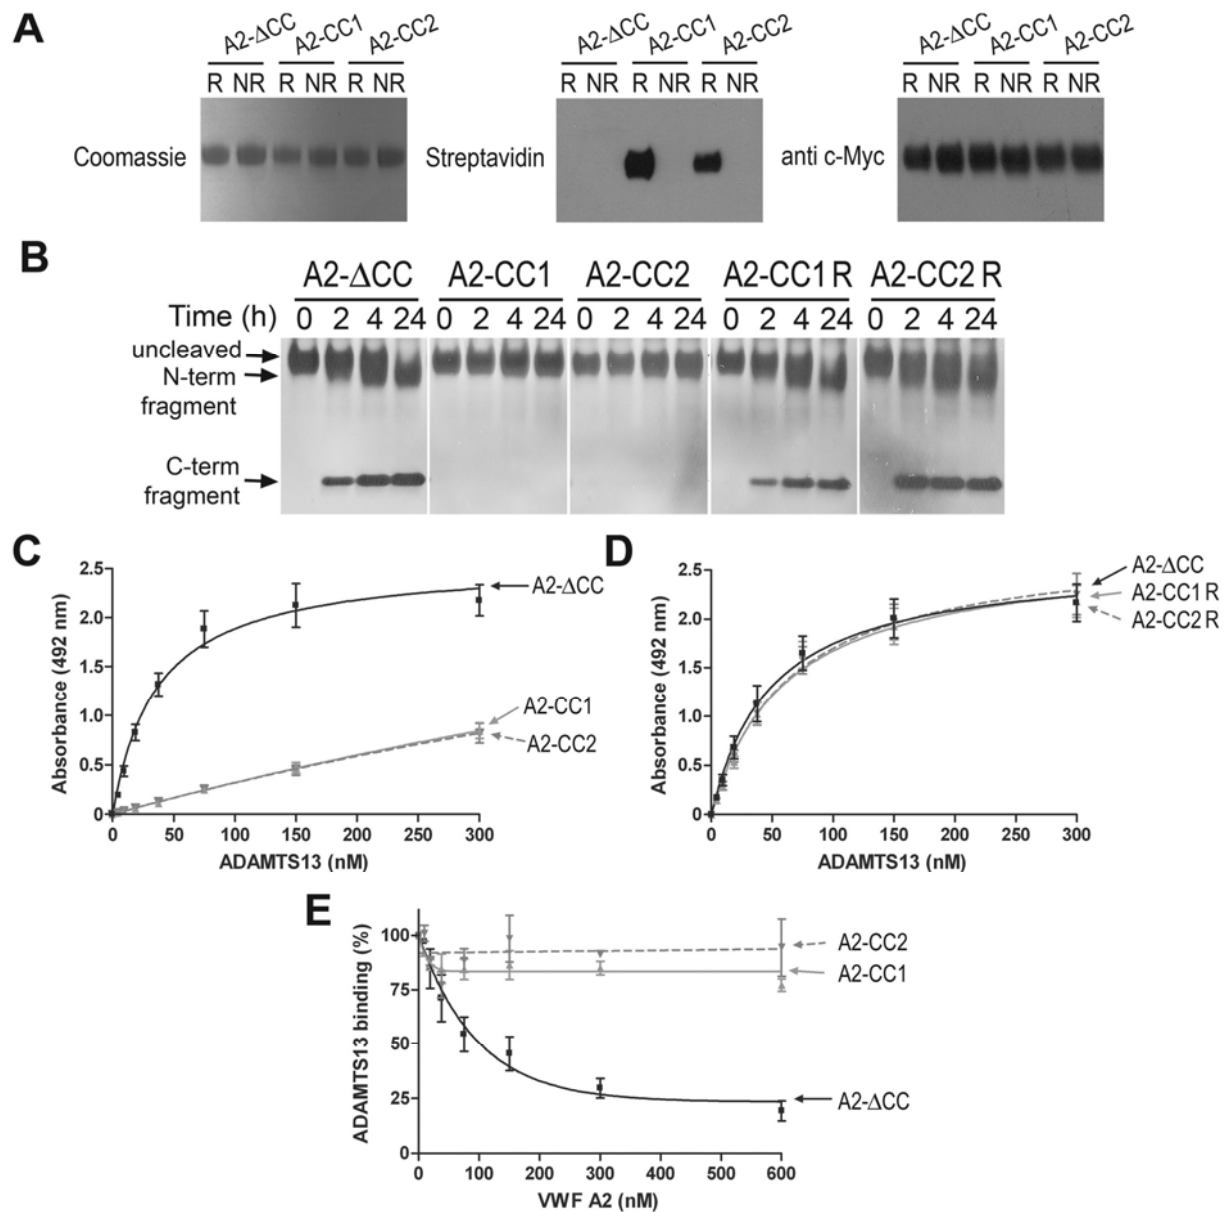

**Figure S2. Analysis of VWF A2- $\Delta$ CC, A2-CC1, and A2-CC2 with engineered disulfide bonds**  
 (A) Left panel: Coomassie stained SDS-PAGE gel with the purified VWF A2 protein fragments, non-reduced (NR) and reduced (R) prior to analysis. Middle panel: VWF A2 fragments were incubated with biotin-labeled maleimide with/without prior reduction. Biotin-labeled sulfhydryl groups were detected on Western blot using peroxidase-labeled streptavidin and were only present on VWF A2-CC1 and A2-CC2 after reduction. Right panel: the same samples as in B were also detected using a monoclonal antibody directed against the c-myc tag to control for equal loading. (B) VWF A2 fragments (NR) and reduced and carboxymethylated forms (R) were incubated at 37°C with 20 nM ADAMTS13 in 1.5M urea for 0–24 hours at which reactions were stopped with EDTA. Samples were reduced and separated on SDS-PAGE and visualized by silver staining. (C) Binding of ADAMTS13 to immobilized VWF A2 fragments. (D) As in (C) but VWF A2 fragments were reduced and carboxymethylated prior to use in the assay. (E) Binding of ADAMTS13 to immobilized VWF A2- $\Delta$ CC in the presence of increasing concentrations of soluble VWF A2- $\Delta$ CC, A2-CC1, and A2-CC2.
